# Supplementary material
Source: Springer Nature journal article supplement (https://www.springermedizin.de/resource/supplementary/12887_2005_99_MOESM9_ESM.pdf/9477266)
Supplement: MOESM9 [file 9477266]

### Haemoglobin <8 g/dL

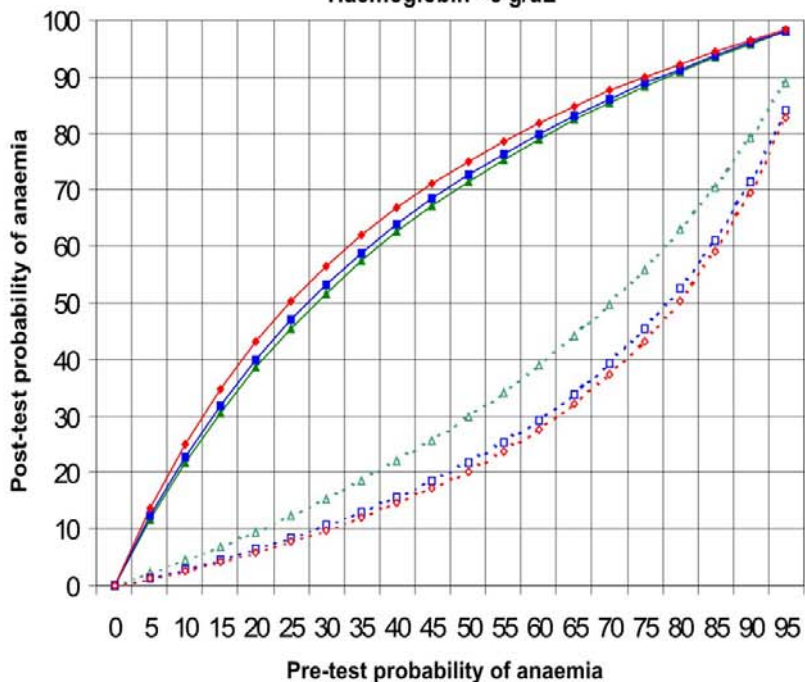

### Haemoglobin <8 g/dL without outlier

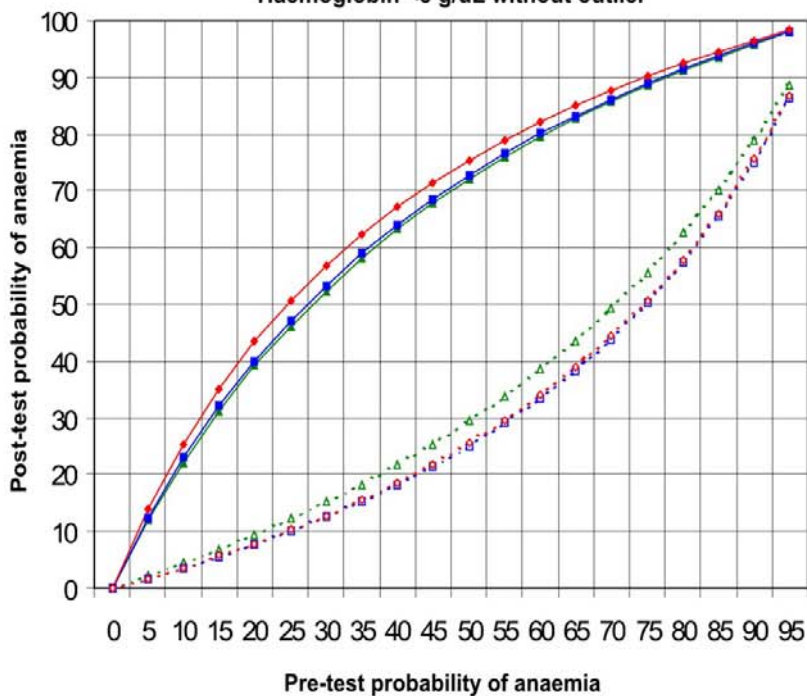

- ▲— Conjunctival pallor +   
 - -▲- - Conjunctival pallor -   
 —■— Palmar pallor +
- -■- - Palmar pallor -   
 —●— Nailbed pallor +   
 - -●- - Nailbed pallor -
